# Supplementary material for: A Systematic Comparison of Protocols for Recovery of High-Quality RNA from Human Islets Extracted by Laser Capture Microdissection
Source: MDPI journal article supplement (doi:10.3390/biom11050625), 2021-04-22
Supplement: s1 [file s1]

Supplementary materials

# A Systematic Comparison of Protocols for Recovery of High Quality RNA From Human Islets Extracted by Laser Capture Microdissection

Chiara M. A. Cefalo <sup>1,2,3</sup>, Teresa Mezza <sup>1,2,3</sup>, Andrea Giaccari <sup>2,3</sup> and Rohit N. Kulkarni <sup>1,\*</sup>

<sup>1</sup> Islet Cell Biology & Regenerative Medicine, Joslin Diabetes Center, Department of Medicine, Brigham and Women's Hospital, Harvard Medical School, Harvard Stem Cell Institute, Boston, MA, USA; cefalo.chiara@gmail.com

<sup>2</sup> Dipartimento di Scienze Mediche e Chirurgiche; Centro per le Malattie Endocrino-metaboliche, Fondazione Policlinico Universitario Agostino Gemelli IRCCS, Roma, Italia; teresa.mezza@gmail.com

<sup>3</sup> Dipartimento di Medicina e Chirurgia Traslazionale, Università Cattolica del Sacro Cuore, Roma, Italia; andrea.giaccari@unicatt.it

\* Correspondence: Rohit.Kulkarni@joslin.harvard.edu

**Citation:** Cefalo, C.M.A.; Mezza, T.; Giaccari, A.; Kulkarni, R.N. A Systematic Comparison of Protocols for Recovery of High-Quality RNA from Human Islets Extracted by Laser Capture Microdissection. *Biomolecules* **2021**, *11*, 625. <https://doi.org/10.3390/biom11050625>

Academic Editor: Roberta Malaguarnera

Received: 2 April 2021

Accepted: 20 April 2021

Published: 22 April 2021

**Publisher's Note:** MDPI stays neutral with regard to jurisdictional claims in published maps and institutional affiliations.

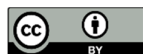

**Copyright:** © 2021 by the authors. Licensee MDPI, Basel, Switzerland. This article is an open access article distributed under the terms and conditions of the Creative Commons Attribution (CC BY) license (<http://creativecommons.org/licenses/by/4.0/>).

**Table S1.** Bioanalyzer assessment of RNA samples extracted using three different protocols with Qiazol from non-diabetic or diabetic patients following partial pancreatectomy (PP) and islets from organ donors (OD).

| SAMPLE ID               | PROTOCOL         | RIN number | Bio. Conc. (pg/ $\mu$ l) |
|-------------------------|------------------|------------|--------------------------|
| PP islets: non-diabetic | QIAZOL           | 1          | 19                       |
|                         | QIAZOL/CLEAN UP  | 2.2        | 878                      |
|                         | MICROKIT/CARRIER | 7.2        | 100                      |
| OD islets: non-diabetic | QIAZOL           | 8.20       | 1.33                     |
|                         | QIAZOL/CLEAN UP  | 9.10       | 12                       |
|                         | MICROKIT/CARRIER | 8.60       | 15.24                    |
| PP islets: diabetic     | QIAZOL           | 1          | 42.2                     |
|                         | QIAZOL/CLEAN UP  | 2.2        | 1.96                     |
|                         | MICROKIT/CARRIER | 4.4        | 29.4                     |
| OD islets: diabetic     | QIAZOL           | N/A        | 125                      |
|                         | QIAZOL/CLEAN UP  | 6.9        | 25                       |
|                         | MICROKIT/CARRIER | 6.3        | 17.88                    |

One  $\mu$ l RNA loaded for each sample was applied to AgilentPicoAChip and analyzed for quantity and quality with the Agilent 2100 Bioanalyzer. PP: pancreatectomized patients. OD: organ donor patients.
